# Supplementary material for: The real part of the refractive indices and effective densities for chemically segregated ambient aerosols in Guangzhou measured by a single-particle aerosol mass spectrometer
Source: Copernicus journal article supplement (doi:10.5194/acp-16-2631-2016), 2016-03-03
Supplement: Supplementary file 1 [file acp-16-2631-2016-supplement.pdf]

Supplement of Atmos. Chem. Phys., 16, 2631–2640, 2016  
<http://www.atmos-chem-phys.net/16/2631/2016/>  
doi:10.5194/acp-16-2631-2016-supplement  
© Author(s) 2016. CC Attribution 3.0 License.

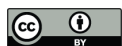

Atmospheric  
Chemistry  
and Physics  
Open Access  
EGU

*Supplement of*

## **The real part of the refractive indices and effective densities for chemically segregated ambient aerosols in Guangzhou measured by a single-particle aerosol mass spectrometer**

**Guohua Zhang et al.**

*Correspondence to:* Xinhui Bi (bixh@gig.ac.cn)

The copyright of individual parts of the supplement might differ from the CC-BY 3.0 licence.

---

## 16 **1 The meteorological conditions over the study**

17 Temporal profiles (in 1 hour resolution) of local meteorological parameters,  
18 including solar radiation, temperature (Temp), relative humidity (RH), wind direction  
19 (WD) and wind speed (WS), and air quality parameters (i.e., NO<sub>x</sub>, SO<sub>2</sub>, O<sub>3</sub>, PM<sub>1</sub>) are  
20 shown in Fig. S1. These parameters were provided by Guangdong Environmental  
21 Monitoring Center (<http://www.gdemc.gov.cn/>). Ambient Temp, RH, and WS over the  
22 study varied between 10.8–31 °C, 20.7–89.8%, and 0.2–3.9 m/s, with average values  
23 of 21.2 °C, 59.9%, and 1.1 m/s, respectively. The concentration peaks for NO<sub>x</sub>, SO<sub>2</sub>,  
24 and PM<sub>1</sub> were often observed during the nighttime, due to the accumulation of  
25 pollutants under unfavorable meteorological conditions with lower WS and lower  
26 boundary layer depth.

## 28 **2 The mass spectral patterns for the single particle types**

29 The mass spectral characteristics are displayed in Fig. S4, and a brief description  
30 is provided as follows.

31 OC group: Mass spectra for OC particles mainly contain the OC markers, and also  
32 some other OC peaks such as 50[C<sub>4</sub>H<sub>2</sub>]<sup>+</sup>, 51[C<sub>4</sub>H<sub>3</sub>]<sup>+</sup>, 55[C<sub>4</sub>H<sub>7</sub>]<sup>+</sup> and 63[C<sub>5</sub>H<sub>3</sub>]<sup>+</sup>. Besides,  
33 a large peak at m/z 39 is also observed in mass spectra of OC, which might be explained  
34 by coagulation between OC and 39[K]<sup>+</sup> or condensation of organic species onto  
35 biomass seed [Moffet *et al.*, 2008]. Particle mass spectra in HMOC type show the  
36 presence of m/z 50, 51, 63, 77, 91, 115, and 128 [Silva and Prather, 2000; Sodeman *et*

---

37 *al.*, 2005]. By including the ion peak from sulfate/nitrate, OC particles were subdivided  
38 into OC-S, OC-SN, and HMOC.

39 EC group: Mass spectra of LC-EC type are dominated by the distinct carbon ion  
40 clusters ranged from  $m/z$  -120 to  $m/z$  180, with minor ion intensities from other species.  
41 SC-EC type is associated with short carbon clusters ions peaks ( $C_n^{+/-}$ ,  $n < 6$ ), generally  
42 internally mixed with intense sulfate ion peak. Differently, NaK-EC type shows the  
43 carbon ion clusters mainly in the negative mass spectra, combined with dominant peaks  
44 from  $23[Na]^+$  and  $39[K]^+$  in the positive ones.

45 ECOC group: ECOC particles have typical carbon ion clusters ( $12[C]^{+/-}$ ,  
46  $24[C_2]^{+/-}$ , ... ,  $12n[C_n]^{+/-}$ ) with  $36[C_3]^+$  as dominant fragments, together with OC  
47 markers (e.g.,  $27[C_2H_3]^+$ ,  $29[C_2H_5]^+$ ,  $37[C_3H]^+$ , and  $43[C_2H_3O]^+$ ). K-rich particles  
48 contain potassium ( $39[K]^+$ ), sulfate ( $-97[HSO_4]^-$ ), nitrate ( $-46[NO_2]^-$  and  $-62[NO_3]^-$ ),  
49 and carbonaceous species (e.g.,  $12[C]^+$ ,  $27[C_2H_3]^+$ ,  $29[C_2H_5]^+$ ,  $36[C_3]^+$ ,  $37[C_3H]^+$ ,  
50  $43[C_2H_3O]^+$ ,  $-26[CN]^-$ ,  $-42[CNO]^-$ ) as major components, similar to those reported in  
51 other studies [*Moffet et al.*, 2008; *Silva et al.*, 1999]. The association of sulfate and/or  
52 nitrate separated the ECOC particles into ECOC-S, ECOC-SN, K-S, K-SN, and K-N  
53 [*Zhang et al.*, 2015].

54 Metal rich group: Peaks corresponding to  $23[Na]^+$ ,  $39[K]^+$ ,  $46[Na_2]^+$ ,  
55  $81/83[Na_2Cl]^+$ , nitrate and chloride ( $-35[Cl]^-$  and  $-37[Cl]^-$ ) are present in mass spectra  
56 of Na-rich, indicating transport and evolution of sea salt particles [*Gaston et al.*, 2011;  
57 *Gaston et al.*, 2013]. Na-K type is characterized by dominant peaks from  $39[K]^+$ ,

---

58 relatively less intense peak from  $23[\text{Na}]^+$ , nitrate and silicate ( $-76[\text{SiO}_3]^-$ ). They are  
59 probably from dust and/or industry sources [*Moffet et al.*, 2008]. Fe-rich type is  
60 identified by strong peaks from iron at m/z 54, 56 and 57, according to their isotopic  
61 components. Similarly, Pb-rich type is identified by strong peaks m/z 206-208, and Cu-  
62 rich is characterized by the presence of isotopic peaks at m/z 63 and 65. Fe-Cu-Pb  
63 represents the internally mixed Fe, Cu, Pb in the individual particles.

64

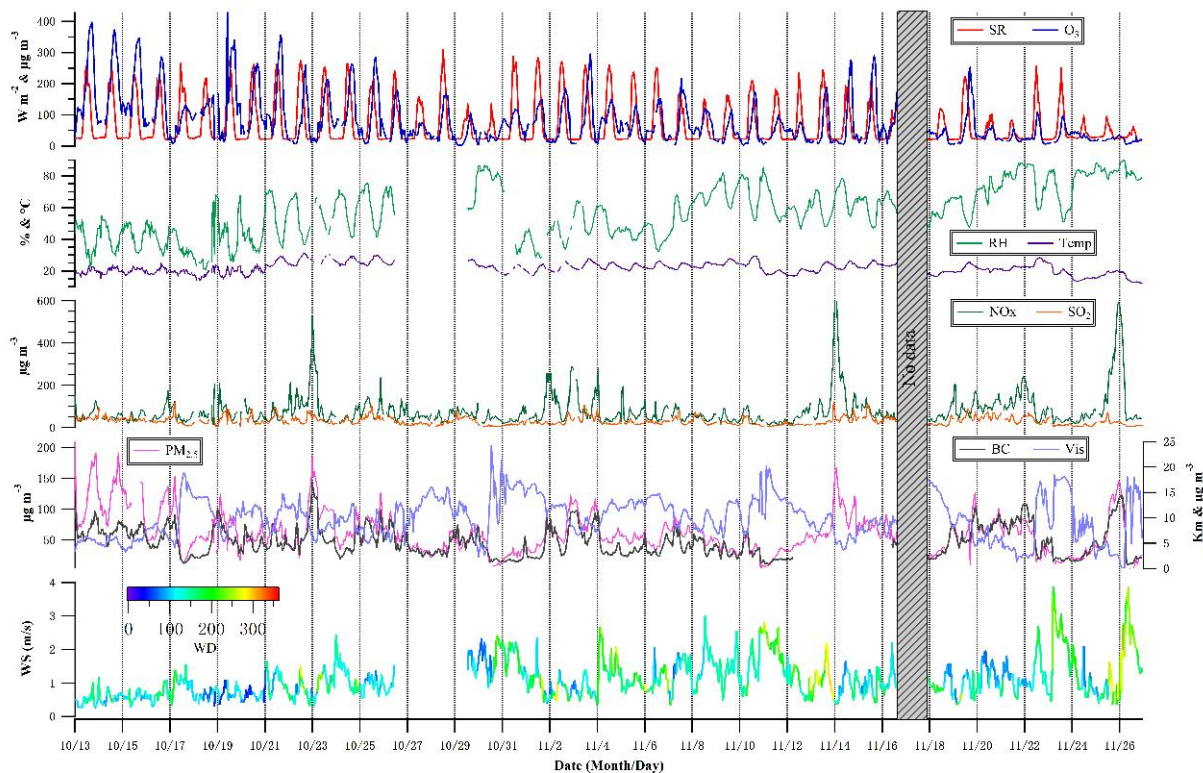

65

66

67 Fig. S1. Temporal profiles (in 1 h resolution) of PM<sub>1</sub>, visibility, and black carbon (BC),  
 68 gaseous pollutants (SO<sub>2</sub>, NO<sub>x</sub>, and O<sub>3</sub>) and meteorological parameters, during the 13<sup>th</sup>  
 69 October–26<sup>th</sup> November 2012 in Guangzhou.

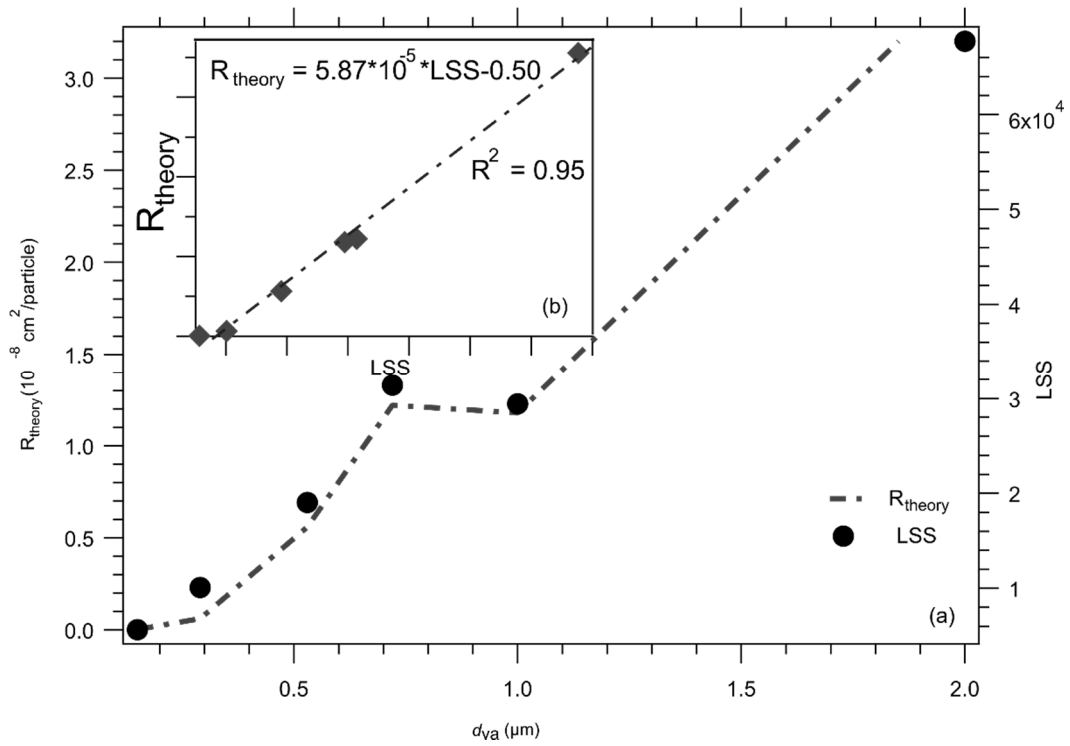

70

71

72 Fig. S2. (a) Upper limit of light scattering signals and theoretical PSCS for PSL as a  
 73 function of size (0.15, 0.3, 0.5, 0.72, 1, and 2  $\mu\text{m}$ ) and (b) their relationship. For PSL,  $n = 1.59$   
 74 and  $\rho_{\text{eff}} = \rho_p = 1.054 \text{ g cm}^{-3}$ .

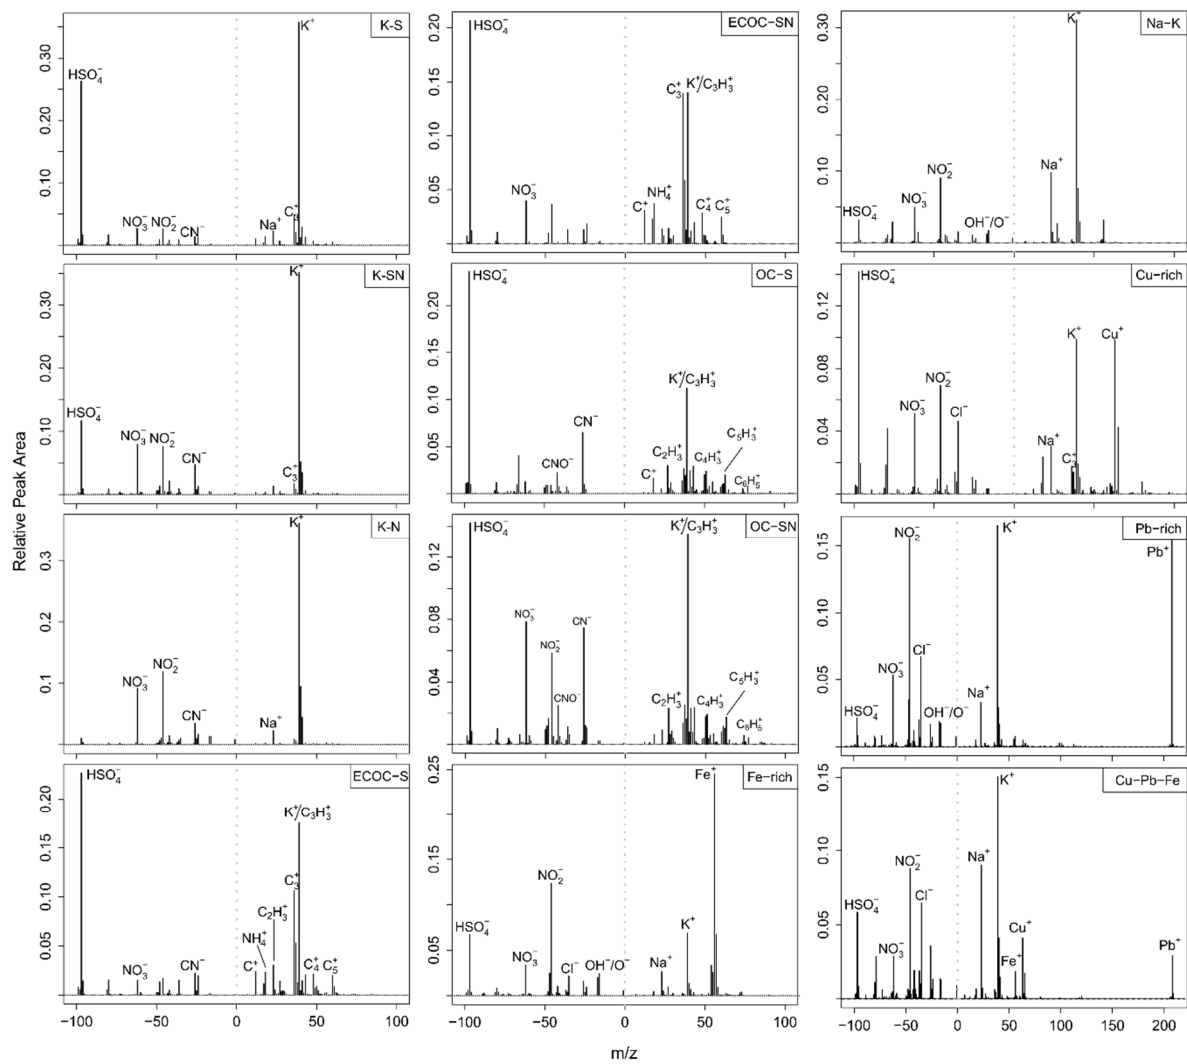

75

76 Fig. S3. Mass spectra for the observed single particle types in the atmosphere of Guangzhou

77 during fall of 2012.

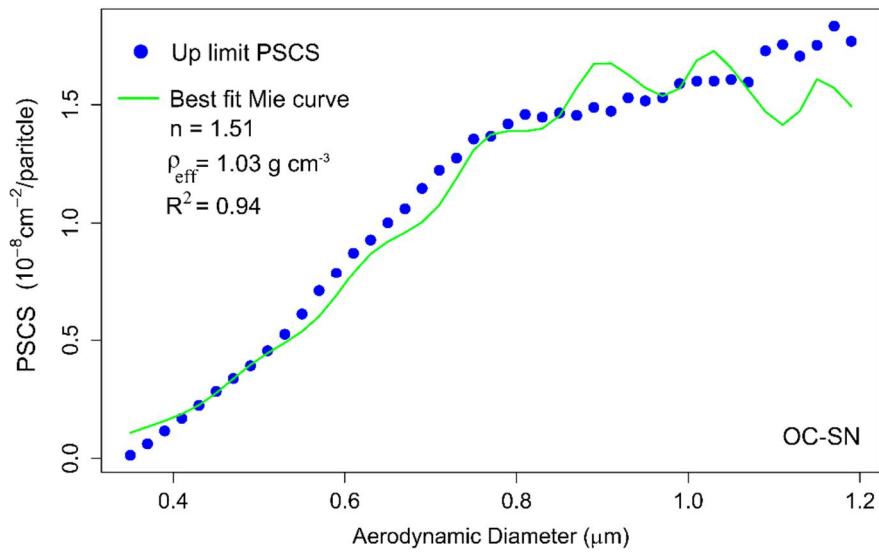

78

79

80

Fig. S4. Measured and best fit theoretical PSCS for OC-SN particle type.



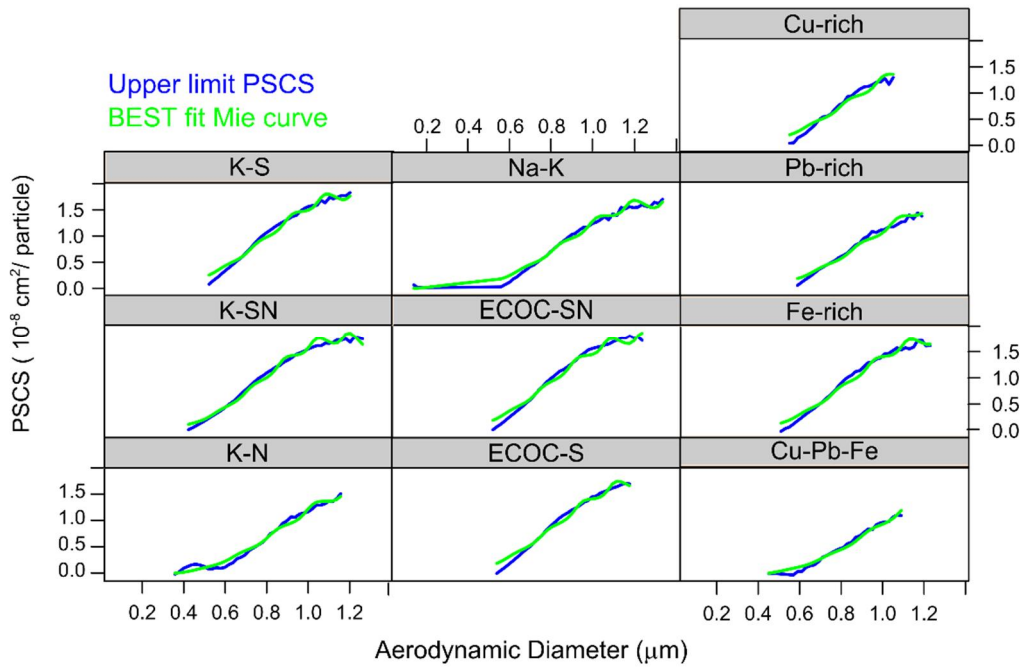

81

82

83 Fig. S5. Measured and best fit theoretical PSCS for various particle types observed

84 in the present study.

---

85 **REFERENCES**

- 86 Gaston, C. J., H. Furutani, S. A. Guazzotti, K. R. Coffee, T. S. Bates, P. K. Quinn, L. I.  
87 Aluwihare, B. G. Mitchell, and K. A. Prather (2011), Unique ocean-derived particles  
88 serve as a proxy for changes in ocean chemistry, *J. Geophys. Res.-Atmos.*, *116*(D18310),  
89 1-13, doi:10.1029/2010jd015289.
- 90 Gaston, C. J., P. K. Quinn, T. S. Bates, J. B. Gilman, D. M. Bon, W. C. Kuster, and K. A.  
91 Prather (2013), The impact of shipping, agricultural, and urban emissions on single  
92 particle chemistry observed aboard the R/V Atlantis during CalNex, *J. Geophys. Res.-*  
93 *Atmos.*, *118*(10), 5003-5017, doi:10.1002/Jgrd.50427.
- 94 Moffet, R. C., B. de Foy, L. T. Molina, M. J. Molina, and K. A. Prather (2008), Measurement  
95 of ambient aerosols in northern Mexico City by single particle mass spectrometry,  
96 *Atmos. Chem. Phys.*, *8*(16), 4499-4516.
- 97 Silva, P. J., D. Y. Liu, C. A. Noble, and K. A. Prather (1999), Size and chemical  
98 characterization of individual particles resulting from biomass burning of local Southern  
99 California species, *Environ. Sci. Technol.*, *33*(18), 3068-3076.
- 100 Silva, P. J., and K. A. Prather (2000), Interpretation of mass spectra from organic compounds  
101 in aerosol time-of-flight mass spectrometry, *Anal. Chem.*, *72*(15), 3553-3562.
- 102 Sodeman, D. A., S. M. Toner, and K. A. Prather (2005), Determination of single particle  
103 mass spectral signatures from light-duty vehicle emissions, *Environ. Sci. Technol.*,  
104 *39*(12), 4569-4580.
- 105 Song, X. H., P. K. Hopke, D. P. Fergenson, and K. A. Prather (1999), Classification of single  
106 particles analyzed by ATOFMS using an artificial neural network, ART-2A, *Anal.*  
107 *Chem.*, *71*(4), 860-865.
- 108 Zhang, G. H., B. X. Han, X. H. Bi, S. H. Dai, W. Huang, D. H. Chen, X. M. Wang, G. Y.  
109 Sheng, J. M. Fu, and Z. Zhou (2015), Characteristics of individual particles in the  
110 atmosphere of Guangzhou by single particle mass spectrometry, *Atmos. Res.*, *153*(0),  
111 286-295, doi:10.1016/j.atmosres.2014.08.016.
